# Supplementary material
Source: PubMed Central journal article supplement (PMC4263772)
Supplement: ry131731suppt3.pdf [file ry131731suppt3.pdf]

**Table E3. Significant ( $P < .05$ ) Correlations between the VASARI Image Features and Quantitative Image Features**

| VASARI Feature                | Quantitative Image Feature            | <i>P</i> Value | False Discovery Rate |
|-------------------------------|---------------------------------------|----------------|----------------------|
| DeepWM-InternalCapsule        | EdgeSharpnessScale-minEnhancement     | .0061062       | 0.0019931            |
| DeepWM-InternalCapsule        | EdgeSharpnessBlurriness-minNecrosis   | .015627        | 0.0025503            |
| DeepWM-InternalCapsule        | EdgeSharpnessWindow-maxEdema          | .039344        | 0.0042806            |
| DefEnhanceMargin-Well-defined | HistogramRaw-varEnhancement           | .00050808      | 0.0091439            |
| DefEnhanceMargin-Well-defined | HistogramRaw-varNecrosis              | .00060198      | 0.005417             |
| DefEnhanceMargin-Well-defined | EdgeSharpnessScale-medianEnhancement  | .0015981       | 0.0041086            |
| DefEnhanceMargin-Well-defined | HistogramRaw-maxNecrosis              | .0018676       | 0.0042014            |
| DefEnhanceMargin-Well-defined | EdgeSharpnessScale-meanEnhancement    | .0025358       | 0.0045638            |
| DefEnhanceMargin-Well-defined | HistogramRaw-kurtosisEnhancement      | .0034165       | 0.0051239            |
| DefEnhanceMargin-Well-defined | EdgeSharpnessScale-medianNecrosis     | .0045674       | 0.0063231            |
| DefEnhanceMargin-Well-defined | EdgeSharpnessScale-minNecrosis        | .0052656       | 0.006769             |
| DefEnhanceMargin-Well-defined | HistogramRaw-maxEnhancement           | .0069547       | 0.0083443            |
| DefEnhanceMargin-Well-defined | EdgeSharpnessWindow-maxEdema          | .0079759       | 0.0089714            |
| DefEnhanceMargin-Well-defined | EdgeSharpnessScale-meanNecrosis       | .0091247       | 0.0096599            |
| DefEnhanceMargin-Well-defined | HistogramRaw-kurtosisEdema            | .0091247       | 0.0091233            |
| DefEnhanceMargin-Well-defined | HistogramRaw-minNecrosis              | .013477        | 0.012766             |
| DefEnhanceMargin-Well-defined | RDS-minEnhancement                    | .013507        | 0.012154             |
| DefEnhanceMargin-Well-defined | HistogramRaw-skewnessNecrosis         | .015335        | 0.013142             |
| DefEnhanceMargin-Well-defined | EdgeSharpnessWindow-medianEdema       | .017377        | 0.014215             |
| DefEnhanceMargin-Well-defined | HistogramRaw-minEnhancement           | .02353         | 0.018412             |
| DefEnhanceMargin-Well-defined | EdgeSharpnessWindow-medianEnhancement | .031562        | 0.023668             |
| DefEnhanceMargin-Well-defined | EdgeSharpnessScale-minEnhancement     | .044147        | 0.031781             |
| Diffusion-Mixed               | RDS-meanEdema                         | .016206        | 0.0023134            |
| Diffusion-Mixed               | HistogramRaw-maxNecrosis              | .029728        | 0.0014146            |
| Diffusion-Mixed               | EdgeSharpnessWindow-maxEnhancement    | .048145        | 0.0013745            |
| EnhanceQual-Marked            | EdgeSharpnessScale-meanEnhancement    | .006008        | 0.047056             |
| EnhanceQual-Marked            | HistogramRaw-varEnhancement           | .006008        | 0.035292             |
| EnhanceQual-Marked            | HistogramRaw-kurtosisEnhancement      | .0084666       | 0.02842              |
| EnhanceQual-Marked            | HistogramRaw-maxNecrosis              | .011789        | 0.034625             |
| EnhanceQual-Marked            | HistogramRaw-skewnessEnhancement      | .011789        | 0.0277               |
| EnhanceQual-Marked            | HistogramRaw-minNecrosis              | .013818        | 0.029517             |
| EnhanceQual-Marked            | HistogramRaw-kurtosisEdema            | .013849        | 0.027117             |
| EnhanceQual-Marked            | EdgeSharpnessWindow-medianEnhancement | .018941        | 0.034235             |
| EnhanceQual-Marked            | HistogramRaw-minEnhancement           | .027523        | 0.043113             |
| EnMarginThick-Thick           | EdgeSharpnessScale-meanEnhancement    | .006008        | 0.046605             |
| EnMarginThick-Thick           | HistogramRaw-varEnhancement           | .006008        | 0.034954             |
| EnMarginThick-Thick           | HistogramRaw-kurtosisEnhancement      | .0084666       | 0.028147             |
| EnMarginThick-Thick           | HistogramRaw-maxNecrosis              | .011789        | 0.034293             |
| EnMarginThick-Thick           | HistogramRaw-skewnessEnhancement      | .011789        | 0.027435             |
| EnMarginThick-Thick           | HistogramRaw-minNecrosis              | .013818        | 0.029234             |
| EnMarginThick-Thick           | HistogramRaw-kurtosisEdema            | .013849        | 0.026857             |
| EnMarginThick-Thick           | EdgeSharpnessWindow-medianEnhancement | .018941        | 0.033906             |
| EnMarginThick-Thick           | HistogramRaw-minEnhancement           | .027523        | 0.042699             |

| VASARI Feature       | Quantitative Image Feature             | P Value   | False Discovery Rate |
|----------------------|----------------------------------------|-----------|----------------------|
| Ependymal-Present    | EdgeSharpnessWindow-maxEnhancement     | .00075393 | 0.021853             |
| PialInvasion-Present | EdgeSharpnessBlurriness-minEdema       | .017726   | 0.036353             |
| PialInvasion-Present | RDS-meanEdema                          | .023057   | 0.023643             |
| PropEdemax-5         | EdgeSharpnessWindow-medianEdema        | .00014633 | 1.67E-05             |
| PropEdemax-5         | HistogramRaw-maxNecrosis               | .016474   | 0.00026912           |
| PropEdemax-5         | HistogramRaw-kurtosisEnhancement       | .01836    | 0.00023329           |
| PropEdemax-5         | HistogramRaw-varEnhancement            | .041499   | 0.00043142           |
| PropEdemax-5         | EdgeSharpnessScale-meanEdema           | .041499   | 0.00039547           |
| PropEdemax-5         | EdgeSharpnessScale-medianEdema         | .045659   | 0.00037295           |
| PropEnhance6-33      | HistogramRaw-kurtosisEdema             | .014376   | 0.042331             |
| PropnCETx-5          | EdgeSharpnessScale-minEnhancement      | .0038787  | 0.0024198            |
| PropnCETx-5          | EdgeSharpnessScale-meanNecrosis        | .0042931  | 0.0013392            |
| PropnCETx-5          | EdgeSharpnessBlurriness-minNecrosis    | .0070317  | 0.0014623            |
| PropnCETx-5          | EdgeSharpnessScale-medianNecrosis      | .0085092  | 0.0013272            |
| PropnCETx-5          | EdgeSharpnessScale-medianEnhancement   | .017574   | 0.0013705            |
| PropnCETx-5          | EdgeSharpnessScale-meanEnhancement     | .029114   | 0.0018163            |
| PropnCETx-5          | HistogramRaw-varEnhancement            | .029114   | 0.0016512            |
| PropNecro34-66       | RDS-meanNecrosis                       | .0045855  | 0.028835             |
| PropNecro34-66       | RDS-minNecrosis                        | .0073054  | 0.036751             |
| PropNecro6-33        | HistogramRaw-kurtosisEdema             | .0085368  | 0.0046563            |
| PropNecro6-33        | HistogramRaw-varEdema                  | .022519   | 0.0061412            |
| PropNecro6-33        | HistogramRaw-medianEdema               | .037925   | 0.0051713            |
| PropNecrox-33        | RDS-meanNecrosis                       | .0045855  | 0.027947             |
| PropNecrox-33        | RDS-minNecrosis                        | .0073054  | 0.035619             |
| PropNecrox-5         | HistogramRaw-skewnessNecrosis          | .00031108 | 0.00060438           |
| PropNecrox-5         | HistogramRaw-kurtosisEdema             | .00059434 | 0.0010104            |
| PropNecrox-5         | HistogramRaw-kurtosisNecrosis          | .0014042  | 0.0021219            |
| PropNecrox-5         | HistogramRaw-maxNecrosis               | .0066676  | 0.0090679            |
| PropNecrox-5         | HistogramRaw-kurtosisEnhancement       | .014758   | 0.018246             |
| PropNecrox-5         | HistogramRaw-varEnhancement            | .021397   | 0.02425              |
| PropNecrox-5         | HistogramRaw-varEdema                  | .033238   | 0.032288             |
| PropNecrox-5         | RDS-meanNecrosis                       | .042748   | 0.038757             |
| PropNecrox-5         | HistogramRaw-maxEnhancement            | .048293   | 0.041049             |
| Satellites-Present   | EdgeSharpnessBlurriness-minEnhancement | .0046202  | 0.0047377            |

Note.—CET = contrast-enhancing tumor, nCET = non-contrast-enhancing tumor, RDS = radial distance signal.
